# Supplementary material for: Quaternized carbon dots with enhanced antimicrobial ability towards Gram-negative bacteria for the treatment of acute peritonitis caused by E. coli
Source: Royal Society of Chemistry journal article supplement (doi:10.1039/d3tb00889d), 2023-01-01
Supplement: d3tb00889d1.pdf [file d3tb00889d1.pdf]

**Quaternization carbon dots with enhanced antimicrobial ability to Gram-negative bacteria  
for the treatment of acute peritonitis caused by *E. coli***

Xintian Zhang<sup>a,#</sup>, Pingping Wu<sup>a,#</sup>, Xiaoli Hao<sup>a</sup>, Jiamiao Liu<sup>a</sup>, Zhengjun Huang<sup>a</sup>, Shaohuang Weng<sup>a,\*</sup>,  
Weifeng Chen<sup>b</sup>, Lingling Huang<sup>c,\*</sup>, Jianyong Huang<sup>b,\*</sup>

<sup>a</sup> Department of Pharmaceutical Analysis, School of Pharmacy, Fujian Medical University, Fuzhou  
350122, China

<sup>b</sup> Department of Pharmacy, Fujian Medical University Union Hospital, Fuzhou, 350001, China

<sup>c</sup> Department of Stomatology, The First Affiliated Hospital of Fujian Medical University, Fuzhou,  
350005, China

# Zhang and Wu contributed equally to this work.

Correspondence: [shweng@fjmu.edu.cn](mailto:shweng@fjmu.edu.cn) (S. Weng), [hjy8191@163.com](mailto:hjy8191@163.com) (J. Huang), and  
[huanglings@163.com](mailto:huanglings@163.com) (L. Huang)

## 1. Experimental section

### Identifying bacteria using mass spectrometry

Preparation of matrix solution: Take 100  $\mu\text{L}$  of lysis solution 2 and buffer solution respectively, add them to the matrix, shake and mix well to fully dissolve the matrix, and set aside. The prepared matrix solution is sealed and stored at 2°C-8°C and can be used for 30 days.

Experimental operation: add 300 $\mu\text{L}$  of deionized water to a 1.5mL centrifuge tube, take a sample (choose 1~2 single colonies from a medium-sized colony) in a centrifuge tube, and shake and mix well. Add 900 $\mu\text{L}$  of absolute ethanol, mix well, centrifuge at room temperature for 2 to 4 minutes (8000rpm to 14800rpm), discard the supernatant, and centrifuge again to completely remove the supernatant. Dry the precipitate at 37°C to 40°C for 2 minutes to 5 minutes, until there is no obvious water mark on the surface of the precipitate. Add 10 $\mu\text{L}$  of lysis solution 1, mix well, then add 10 $\mu\text{L}$  equal volume of lysis solution 2, mix well, and centrifuge at room temperature for 2 to 4 minutes (8000rpm-14800rpm). Aspirate 1 $\mu\text{L}$  of the supernatant, drop it on the sample target, and air dry until there is no obvious water trace on the sample point. Take 1 $\mu\text{L}$  of matrix solution to cover the above-mentioned sample point, and air-dry until there is no

obvious water mark on the sample point. The sample target is placed into the mass spectrometer for identification.

**Table S1.** Pretreatment reagents for mass spectrometry samples

| number | Solution name                                     | 100 tests/box |
|--------|---------------------------------------------------|---------------|
| 1      | Lysate 1 (formic acid-containing solution)        | 1.0ml         |
| 2      | Lysate 2 (acetonitrile-containing solution)       | 1.1ml         |
| 3      | Buffer (solution containing trifluoroacetic acid) | 0.3ml         |
| 4      | Matrix (with alpha-cyano-4-hydroxycinnamic acid)  | 2.0mg         |

## 2. Figures and Figure captions

**Table S2.** MICs of QCDS against five samples of clinical drug-resistant bacteria.

| Bacterial Strains           | G <sup>+</sup> / G <sup>-</sup> | MIC( $\mu$ g/mL) |
|-----------------------------|---------------------------------|------------------|
| Resistant <i>E. coli</i> -1 | G <sup>-</sup>                  | 30               |
| Resistant <i>E. coli</i> -2 | G <sup>-</sup>                  | 30               |
| Resistant <i>E. coli</i> -3 | G <sup>-</sup>                  | 30               |
| Resistant <i>E. coli</i> -4 | G <sup>-</sup>                  | 30               |
| Resistant <i>E. coli</i> -5 | G <sup>-</sup>                  | 30               |

**Table S3.** The MIC of recent several carbon dots to *E. coli*.

| Kinds of Materials | MIC value      | Ref.       |
|--------------------|----------------|------------|
| PC-CQDs            | 120 $\mu$ g/mL | 1          |
| QCQD               | 640 $\mu$ g/mL | 2          |
| qCQDs              | 50 $\mu$ g/mL  | 3          |
| FA-CD              | >2 mg/mL       | 4          |
| P-doped CQDs       | 1.23 mg/mL     | 5          |
| GCD                | 50 $\mu$ g/mL  | 6          |
| CNDs               | 192 $\mu$ g/mL | 7          |
| F-CDs              | 64 $\mu$ g/mL  | 8          |
| QCDS               | 30 $\mu$ g/mL  | This study |

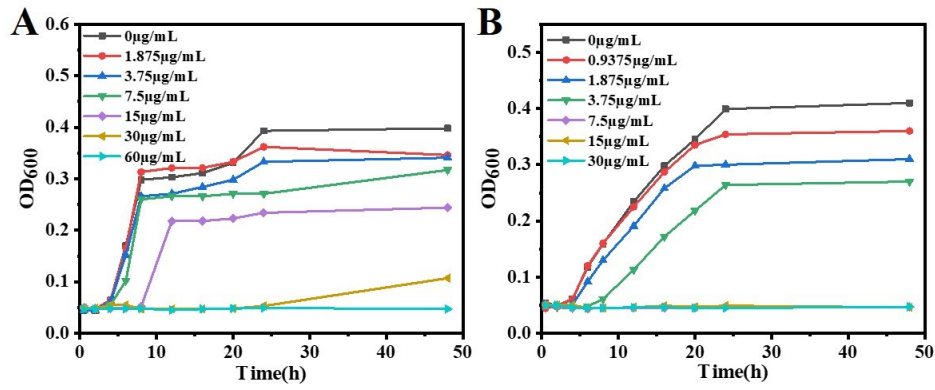

**Figure S1.** Bacterial inhibition curves by QCDs. (A) *E. coli*. (B) *S. aureus*.

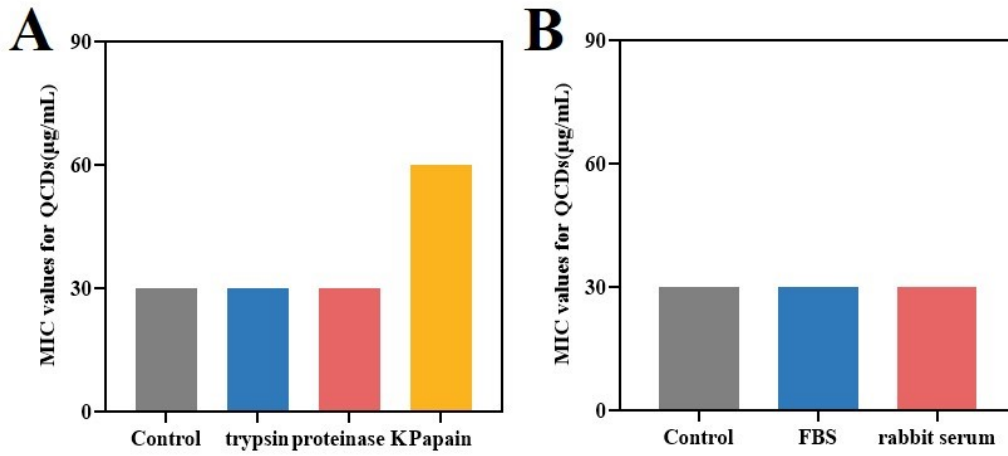

**Figure S2.** Stability of antimicrobial activity of QCDs in different conditions against *E. coli*. (A) Various protein. (B) Various serum.

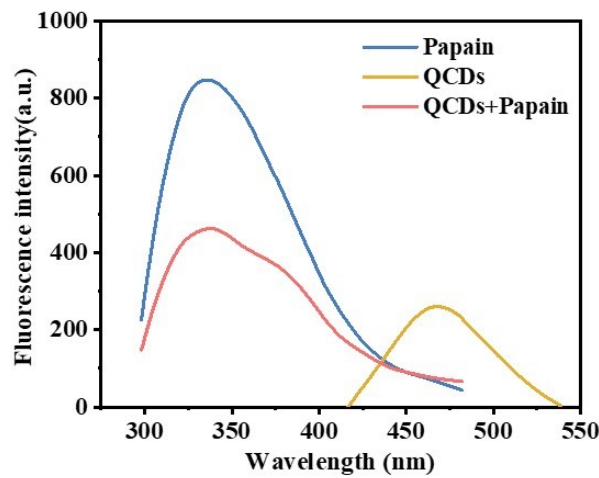

**Figure S3.** Fluorescence spectra of papain, QCDs and the interaction of QCDs and papain.

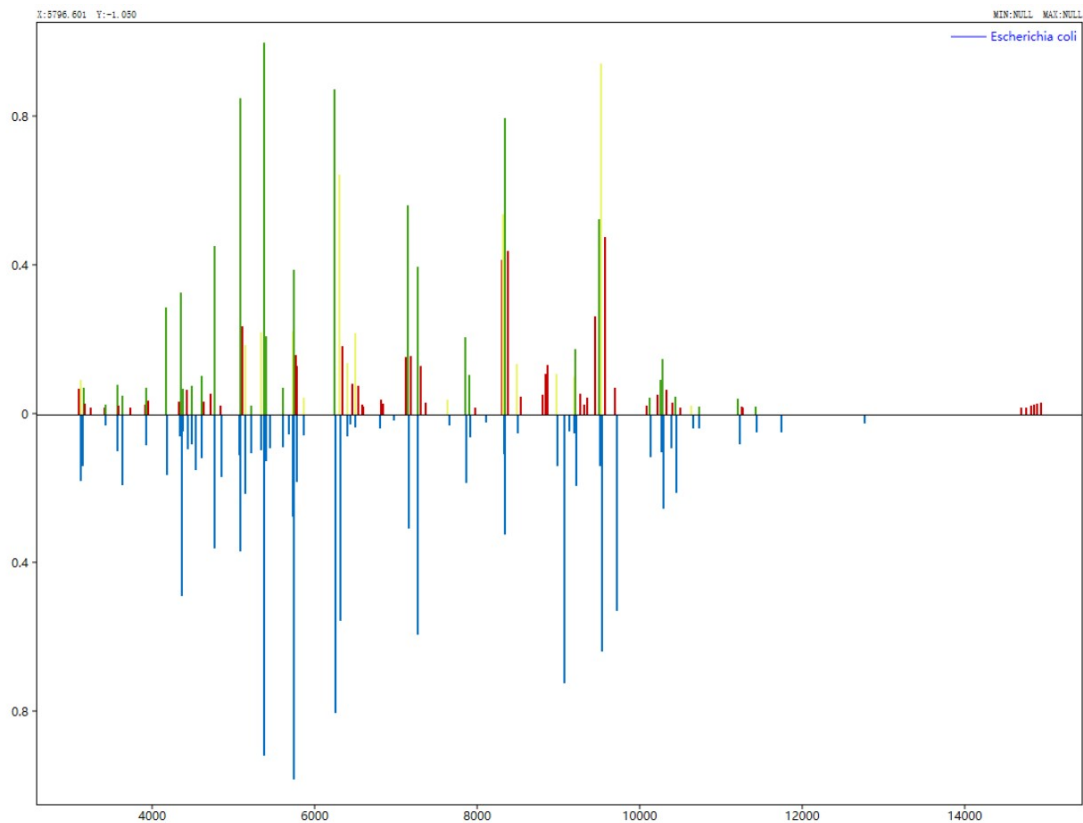

**Figure S4.** The MS identification result of the colonies on the petri dish of the rat in the negative control group.

## References

- [1] X. L. Hao, L. L. Huang, C. F. Zhao, S. N. Chen, W. J. Lin, Y. N. Lin, L. R. Zhang, A. A. Sun, C. F. Miao, X. H. Lin, M. Chen and S. H. Weng, *Mater. Sci. Eng. C*, 2021, **123**, 111971.
- [2] C. F. Zhao, L. N. Wu, X. W. Wang, S. H. Weng, Z. P. Ruan, Q. C. Liu, L. Q. Lin and X. H. Lin, *Carbon*, 2020, **163**, 70-84.
- [3] C. F. Zhao, X. W. Wang, L. Y. Yu, L. N. Wu, X. L. Hao, Q. C. Liu, L. Q. Lin, Z. J. Huang, Z. P. Ruan, S. H. Weng, A. L. Liu and X. H. Lin, *Acta Biomater*, 2022, **138**, 528-544.
- [4] M. Yu, X. Guo, H. Lu, P. Li, R. Huang, C. Xu, X. Gong, Y. Xiao and X. Xing, *Carbon*, 2022, **199**, 395-406.

- [5] S. Chai, L. Zhou, S. Pei, Z. Zhu and B. Chen, *Micromachines (Basel)*, 2021, **12**, 1116.
- [6] Z.Y. Wang, L.A. Sheng, X.X. Yang, J.D. Sun, Y.L. Ye, S.X. Geng, D.L. Ning, J.Y. Zheng, M.H. Fan, Y.Z. Zhang and X.L. Sun, *Sustainable Materials and Technologies*, 2023, **36**, e00584.
- [7] F. Du, S. Shuang, Z. Guo, X. Gong, C. Dong, M. Xian and Z. Yang, *Talanta*, 2020, **206**, 120243.
- [8] J. Liang, W. Li, J. Chen, X. Huang, Y. Liu, X. Zhang, W. Shu, B. Lei and H. Zhang, *ACS Appl Bio Mater*, 2021, **4**, 6937-6945.
